# Supplementary material for: Thermal-stability synergy improvement of Sm3+ and Eu3+ in Ca3.6In3.6(PO4)6: the effect of local symmetry
Source: Royal Society of Chemistry journal article supplement (doi:10.1039/d2tc05406j), 2023-01-01
Supplement: d2tc05406j1.pdf [file d2tc05406j1.pdf]

## Thermal-stability Synergy Improvement of Sm<sup>3+</sup> and Eu<sup>3+</sup> in Ca<sub>3.6</sub>In<sub>3.6</sub>(PO<sub>4</sub>)<sub>6</sub>: the Effect of Local Symmetry

Rong-Rong Wang,<sup>1,2</sup> Gui-Hua Li,<sup>1,2</sup> Ge-Mei Cai<sup>\*1,2</sup>

<sup>1</sup>School of Materials Science and Engineering, Central South University, Changsha 410083,  
Hunan, P. R. China

<sup>2</sup>Science Center for Phase Diagram & Materials Design and Manufacture, Central South  
University, Changsha 410083, Hunan, P. R. China

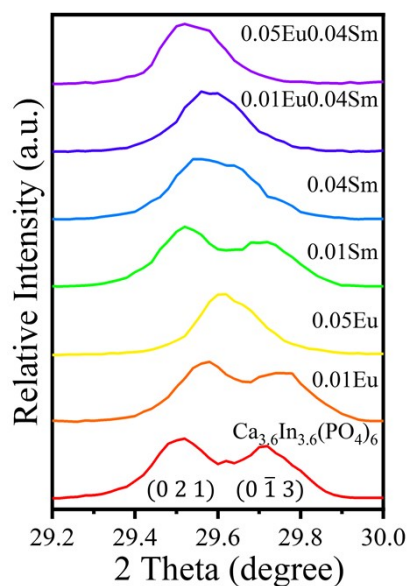

**Figure S1** The XRD magnification in 2-Theta range between 29.2° and 30° in **Figure 1(a)**.

**Table S1** Rietveld refinement for the  $CI_{1-x}P$ : 0.05Eu<sup>3+</sup>,  $CI_{1-y}P$ : 0.04Sm<sup>3+</sup>, and  $CI_{1-x-y}P$ : 0.05Eu<sup>3+</sup>, 0.04Sm<sup>3+</sup>.

| Formula             | Ca <sub>3.420</sub> Eu <sub>0.180</sub> In <sub>3.6</sub> (PO <sub>4</sub> ) <sub>6</sub> | Ca <sub>3.456</sub> Sm <sub>0.144</sub> In <sub>3.6</sub> (PO <sub>4</sub> ) <sub>6</sub> | Ca <sub>3.276</sub> Sm <sub>0.144</sub> Eu <sub>0.180</sub> In <sub>3.6</sub> (PO <sub>4</sub> ) <sub>6</sub> |
|---------------------|-------------------------------------------------------------------------------------------|-------------------------------------------------------------------------------------------|---------------------------------------------------------------------------------------------------------------|
| Sample              | Multi-crystal powder                                                                      | Multi-crystal powder                                                                      | Multi-crystal powder                                                                                          |
| R <sub>B</sub> (%)  | 6.31                                                                                      | 6.49                                                                                      | 5.70                                                                                                          |
| R <sub>p</sub> (%)  | 7.37                                                                                      | 7.32                                                                                      | 7.10                                                                                                          |
| R <sub>WP</sub> (%) | 9.76                                                                                      | 9.74                                                                                      | 9.36                                                                                                          |
| S                   | 2.20                                                                                      | 2.28                                                                                      | 2.36                                                                                                          |
| Symmetry            | Triclinic                                                                                 | Triclinic                                                                                 | Triclinic                                                                                                     |
| Space group         | P $\bar{1}$ (No.2)                                                                        | P $\bar{1}$ (No.2)                                                                        | P $\bar{1}$ (No.2)                                                                                            |
| a (Å)               | 6.5001(1)                                                                                 | 6.4977(1)                                                                                 | 6.5047(1)                                                                                                     |
| b (Å)               | 9.1903(1)                                                                                 | 9.1973(1)                                                                                 | 9.1753(1)                                                                                                     |

\*The corresponding author. E-mail address: caigemei@csu.edu.cn (G.M. Cai)

|                                         |             |             |             |
|-----------------------------------------|-------------|-------------|-------------|
| c (Å)                                   | 9.2899(1)   | 9.2798(1)   | 9.3149(1)   |
| $\alpha$ (°)                            | 110.9844(6) | 110.9799(7) | 111.0247(6) |
| $\beta$ (°)                             | 101.3658(7) | 101.3440(8) | 101.3663(7) |
| $\gamma$ (°)                            | 108.2570(7) | 108.2461(8) | 108.2853(7) |
| V (Å <sup>3</sup> )                     | 461.17(1)   | 460.99(1)   | 461.67(1)   |
| Z                                       | 2           | 2           | 2           |
| Calculated density (g/cm <sup>3</sup> ) | 4.08        | 4.08        | 4.10        |

**Table S2** Atomic parameters for Cl<sub>1-x</sub>P: 0.05Eu<sup>3+</sup>.

| Atom | x          | y          | z           | Wyck. | OCC.    | U (Å <sup>2</sup> ) |
|------|------------|------------|-------------|-------|---------|---------------------|
| O1   | 0.1752(19) | 0.7248(16) | 0.0380(14)  | 2i    | 1       | 0.0007              |
| O2   | 0.4064(20) | 0.1730(15) | 0.390(1)    | 2i    | 1       | 0.0007              |
| O3   | 1.1097(17) | 0.7683(13) | -0.4379(11) | 2i    | 1       | 0.0023              |
| O4   | 0.0233(16) | 0.0092(6)  | 0.2042(14)  | 2i    | 1       | 0.0103              |
| O5   | 0.968(2)   | 0.4963(15) | -0.6788(15) | 2i    | 1       | 0.0075              |
| O6   | 0.874(3)   | 0.7464(15) | -0.6694(15) | 2i    | 1       | 0.0183              |
| O7   | 0.409(3)   | 0.8389(17) | 0.3151(11)  | 2i    | 1       | 0.0584              |
| O8   | 0.400(2)   | 0.0747(17) | 0.1173(15)  | 2i    | 1       | 0.0103              |
| O9   | 0.232(2)   | 0.2886(7)  | 0.1871(5)   | 2i    | 1       | 0.0425              |
| O10  | 0.520(2)   | 0.7880(17) | 0.0663(16)  | 2i    | 1       | 0.0325              |
| O11  | 0.6840(12) | 0.5330(15) | -0.5720(12) | 2i    | 1       | 0.0243              |
| O12  | 0.655(2)   | 0.4576(6)  | -0.1365(6)  | 2i    | 1       | 0.0435              |
| P1   | 0.2611(9)  | 0.1284(7)  | 0.2199(6)   | 2i    | 1       | 0.0007              |
| P2   | 0.9076(9)  | 0.6348(6)  | -0.5954(6)  | 2i    | 1       | 0.0047              |
| P3   | 0.3519(9)  | 0.7083(7)  | 0.1387(6)   | 2i    | 1       | 0.0012              |
| Ca1  | 0.2186(8)  | 0.8298(6)  | 0.8401(5)   | 2i    | 1       | 0.001               |
| Ca2  | 0.2624(14) | 0.9953(12) | 0.4977(10)  | 2i    | 0.80000 | 0.068               |
| In1  | 0.8271(3)  | 0.7242(2)  | 0.0669(2)   | 2i    | 0.95498 | 0.017               |
| Eu1  | 0.8271(3)  | 0.7242(2)  | 0.0669(2)   | 2i    | 0.04502 | 0.017               |
| In2  | 0.6469(4)  | 0.4382(3)  | -0.3853(2)  | 2i    | 0.75496 | 0.0082              |
| Eu2  | 0.6469(4)  | 0.4382(3)  | -0.3853(2)  | 2i    | 0.04488 | 0.0082              |

**Table S3** Atomic parameters for Cl<sub>1-y</sub>P: 0.04Sm<sup>3+</sup>.

| Atom | x          | y          | z           | Wyck. | OCC.    | U (Å <sup>2</sup> ) |
|------|------------|------------|-------------|-------|---------|---------------------|
| O1   | 0.1762(18) | 0.7206(16) | 0.0410(14)  | 2i    | 1       | 0.0024              |
| O2   | 0.3994(19) | 0.1781(15) | 0.3928(10)  | 2i    | 1       | 0.0024              |
| O3   | 1.1076(17) | 0.7705(13) | -0.4301(11) | 2i    | 1       | 0.0024              |
| O4   | 0.0332(17) | 0.0096(6)  | 0.2060(14)  | 2i    | 1       | 0.0154              |
| O5   | 0.967(2)   | 0.5018(14) | -0.6860(14) | 2i    | 1       | 0.0083              |
| O6   | 0.874(3)   | 0.7444(16) | -0.6730(17) | 2i    | 1       | 0.0507              |
| O7   | 0.425(3)   | 0.8484(17) | 0.3215(11)  | 2i    | 1       | 0.0713              |
| O8   | 0.396(2)   | 0.0685(16) | 0.1076(14)  | 2i    | 1       | 0.0024              |
| O9   | 0.234(2)   | 0.2883(7)  | 0.1867(5)   | 2i    | 1       | 0.0695              |
| O10  | 0.514(2)   | 0.7988(18) | 0.0676(17)  | 2i    | 1       | 0.0648              |
| O11  | 0.6886(12) | 0.5388(17) | -0.5675(14) | 2i    | 1       | 0.0638              |
| O12  | 0.346(2)   | 0.5428(6)  | 0.1341(5)   | 2i    | 1       | 0.0138              |
| P1   | 0.2646(9)  | 0.1305(7)  | 0.2195(6)   | 2i    | 1       | 0.0077              |
| P2   | 0.9146(9)  | 0.6379(6)  | -0.5916(7)  | 2i    | 1       | 0.0135              |
| P3   | 0.3628(10) | 0.7153(7)  | 0.1444(6)   | 2i    | 1       | 0.015               |
| Ca1  | 0.2252(8)  | 0.8258(6)  | 0.8409(5)   | 2i    | 1       | 0.0099              |
| Ca2  | 0.2557(14) | 0.9899(11) | 0.4943(10)  | 2i    | 0.80000 | 0.0661              |
| In1  | 0.8271(3)  | 0.7256(2)  | 0.0674(2)   | 2i    | 0.98450 | 0.0194              |
| Sm1  | 0.8271(3)  | 0.7256(2)  | 0.0674(2)   | 2i    | 0.01550 | 0.0194              |
| In2  | 0.6461(4)  | 0.4375(3)  | -0.3836(2)  | 2i    | 0.74350 | 0.016               |
| Sm2  | 0.6461(4)  | 0.4375(3)  | -0.3836(2)  | 2i    | 0.05643 | 0.016               |

**Table S4** Atomic parameters for  $\text{Cl}_{1-x-y}\text{P}: 0.05\text{Eu}^{3+}, 0.04\text{Sm}^{3+}$ .

| Atom | x          | y          | z           | Wyck. | OCC     | U [Å <sup>2</sup> ] |
|------|------------|------------|-------------|-------|---------|---------------------|
| O1   | 0.1511(17) | 0.7185(15) | 0.0485(14)  | 2i    | 1       | 0.0156              |
| O2   | 0.4087(20) | 0.1793(16) | 0.3903(10)  | 2i    | 1       | 0.0178              |
| O3   | 1.1005(16) | 0.7564(12) | -0.4408(10) | 2i    | 1       | 0.0003              |
| O4   | 0.0296(16) | 0.0085(6)  | 0.1854(13)  | 2i    | 1       | 0.0228              |
| O5   | 0.964(2)   | 0.4907(13) | -0.6874(13) | 2i    | 1       | 0.0032              |
| O6   | 0.864(2)   | 0.7316(14) | -0.6894(13) | 2i    | 1       | 0.0069              |
| O7   | 0.409(3)   | 0.8264(18) | 0.3146(11)  | 2i    | 1       | 0.0987              |
| O8   | 0.3888(19) | 0.0702(15) | 0.1055(12)  | 2i    | 1       | 0.0047              |
| O9   | 0.222(2)   | 0.2945(7)  | 0.1840(5)   | 2i    | 1       | 0.0943              |
| O10  | 0.529(2)   | 0.7941(18) | 0.0837(17)  | 2i    | 1       | 0.0733              |
| O11  | 0.6843(11) | 0.5442(14) | -0.5641(11) | 2i    | 1       | 0.0063              |
| O12  | 0.356(2)   | 0.5417(6)  | 0.1395(6)   | 2i    | 1       | 0.0558              |
| P1   | 0.2669(9)  | 0.1434(7)  | 0.2229(6)   | 2i    | 1       | 0.0198              |
| P2   | 0.9057(9)  | 0.6304(6)  | -0.5965(6)  | 2i    | 1       | 0.0124              |
| P3   | 0.3539(10) | 0.7130(7)  | 0.1418(7)   | 2i    | 1       | 0.0353              |
| Ca1  | 0.2232(7)  | 0.8332(6)  | 0.8430(5)   | 2i    | 1       | 0.0034              |
| Ca2  | 0.2554(15) | 0.9923(12) | 0.4893(11)  | 2i    | 0.80000 | 0.1106              |
| In1  | 0.8259(3)  | 0.7255(2)  | 0.06998(20) | 2i    | 0.91872 | 0.0349              |
| Eu1  | 0.8259(3)  | 0.7255(2)  | 0.06998(20) | 2i    | 0.03427 | 0.0349              |
| Sm1  | 0.8259(3)  | 0.7255(2)  | 0.06998(20) | 2i    | 0.04701 | 0.0349              |
| In2  | 0.6513(4)  | 0.4366(3)  | -0.3864(2)  | 2i    | 0.71925 | 0.0163              |
| Eu2  | 0.6513(4)  | 0.4366(3)  | -0.3864(2)  | 2i    | 0.05582 | 0.0163              |
| Sm2  | 0.6513(4)  | 0.4366(3)  | -0.3864(2)  | 2i    | 0.02494 | 0.0163              |

**Table S5** The partial bond lengths (Å) of  $CI_{1-x}P: 0.05Eu^{3+}$ ,  $CI_{1-y}P: 0.04Sm^{3+}$ , and  $CI_{1-x-y}P: 0.05Eu^{3+}, 0.04Sm^{3+}$ .

|             |     |              |        |             |     |                |        |
|-------------|-----|--------------|--------|-------------|-----|----------------|--------|
| In1 Eu1     | O12 | x, y, z      | 2.2268 | In2 Eu2     | O11 | x, y, z        | 2.2228 |
|             | O4  | 1+x, 1+y, z  | 2.2331 |             | O11 | 1-x, 1-y, -1-z | 2.2247 |
|             | O10 | x, y, z      | 2.2494 |             | O12 | x, y, z        | 2.2423 |
|             | O9  | 1-x, 1-y, -z | 2.2682 |             | O9  | 1-x, 1-y, -z   | 2.2789 |
|             | O1  | 1+x, y, z    | 2.3291 |             | O5  | 2-x, 1-y, -1-z | 2.2792 |
|             | O6  | x, y, 1+z    | 2.3333 |             | O2  | x, y, -1+z     | 2.3290 |
| Average     |     |              | 2.2733 | Average     |     |                | 2.2628 |
| In1 Sm1     | O12 | 1-x, 1-y, -z | 2.2325 | In2 Sm2     | O11 | 1-x, 1-y, -1-z | 2.2277 |
|             | O4  | 1+x, 1+y, z  | 2.2353 |             | O11 | x, y, z        | 2.2404 |
|             | O9  | 1-x, 1-y, -z | 2.2623 |             | O12 | 1-x, 1-y, -z   | 2.2457 |
|             | O6  | x, y, 1+z    | 2.3035 |             | O9  | 1-x, 1-y, -z   | 2.2837 |
|             | O10 | x, y, z      | 2.3346 |             | O5  | 2-x, 1-y, -1-z | 2.2963 |
|             | O1  | 1+x, y, z    | 2.3417 |             | O2  | x, y, -1+z     | 2.3062 |
| Average     |     |              | 2.2850 | Average     |     |                | 2.2667 |
| In1 Sm1 Eu1 | O1  | 1+x, y, z    | 2.1739 | In2 Eu2 Sm2 | O11 | 1-x, 1-y, -1-z | 2.2173 |
|             | O6  | x, y, 1+z    | 2.1756 |             | O11 | x, y, z        | 2.2215 |
|             | O4  | 1+x, 1+y, z  | 2.2170 |             | O12 | 1-x, 1-y, -z   | 2.2513 |
|             | O10 | x, y, z      | 2.2190 |             | O9  | 1-x, 1-y, -z   | 2.2591 |
|             | O12 | 1-x, 1-y, -z | 2.2512 |             | O5  | 2-x, 1-y, -1-z | 2.2682 |
|             | O9  | 1-x, 1-y, -z | 2.2570 |             | O2  | x, y, -1+z     | 2.2921 |
| Average     |     |              | 2.2156 | Average     |     |                | 2.2516 |

**Table S6** The D values for  $CI_{1-x}P: 0.05Eu^{3+}$ ,  $CI_{1-y}P: 0.04Sm^{3+}$ , and  $CI_{1-x-y}P: 0.05Eu^{3+}, 0.04Sm^{3+}$  phosphors.

| D       | $CI_{1-x}P: 0.05Eu^{3+}$ | $CI_{1-y}P: 0.04Sm^{3+}$ | $CI_{1-x-y}P: 0.05Eu^{3+}, 0.04Sm^{3+}$ |
|---------|--------------------------|--------------------------|-----------------------------------------|
| In1     | 0.0170                   | 0.0182                   | 0.0123                                  |
| In2     | 0.0145                   | 0.0127                   | 0.0096                                  |
| Average | 0.01575                  | 0.01545                  | 0.01095                                 |

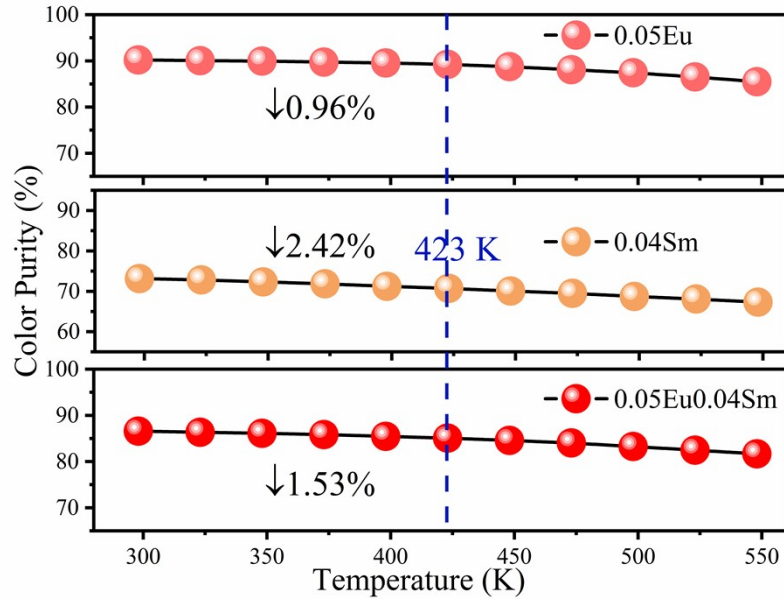

**Figure S2** The color purity variation curve for  $\text{Cl}_{1-x}\text{P}: 0.05\text{Eu}^{3+}$ ,  $\text{Cl}_{1-y}\text{P}: 0.04\text{Sm}^{3+}$ , and  $\text{Cl}_{1-x-y}\text{P}: 0.05\text{Eu}^{3+}, 0.04\text{Sm}^{3+}$  phosphors.

**Table S7** The CIE and color purity of  $\text{Cl}_{1-x}\text{P}: 0.05\text{Eu}^{3+}$  in different temperature.

| Temperature (K) | (x, y)          | CTT (K) | color purity (%) |
|-----------------|-----------------|---------|------------------|
| 298             | (0.6419,0.3544) | 7298    | 90.21            |
| 323             | (0.6414,0.3547) | 7205    | 90.05            |
| 348             | (0.6411,0.3549) | 7146    | 89.96            |
| 373             | (0.6404,0.3554) | 7007    | 89.75            |
| 398             | (0.6398,0.3559) | 6879    | 89.56            |
| 423             | (0.6388,0.3567) | 6676    | 89.25            |
| 448             | (0.6372,0.3580) | 6364    | 88.75            |
| 473             | (0.6351,0.3595) | 6008    | 88.09            |
| 498             | (0.6330,0.3609) | 5687    | 87.44            |
| 523             | (0.6301,0.3626) | 5303    | 86.54            |
| 548             | (0.6267,0.3645) | 4903    | 85.48            |
| 573             | (0.6249,0.3661) | 4652    | 84.90            |

**Table S8** The CIE and color purity of  $\text{Cl}_{1-y}\text{P: 0.04Sm}^{3+}$  in different temperature.

| Temperature (K) | (x, y)          | CTT (K) | color purity (%) |
|-----------------|-----------------|---------|------------------|
| 298             | (0.5906,0.3956) | 2217    | 73.15            |
| 323             | (0.5897,0.3963) | 2197    | 72.82            |
| 348             | (0.5883,0.3972) | 2159    | 72.33            |
| 373             | (0.5870,0.3981) | 2129    | 71.87            |
| 398             | (0.5852,0.3993) | 2091    | 71.23            |
| 423             | (0.5838,0.4003) | 2063    | 70.72            |
| 448             | (0.5820,0.4015) | 2031    | 70.08            |
| 473             | (0.5804,0.4025) | 2006    | 69.51            |
| 498             | (0.5782,0.4036) | 1978    | 68.74            |
| 523             | (0.5765,0.4048) | 1955    | 68.11            |
| 548             | (0.5743,0.4060) | 1933    | 67.33            |
| 573             | (0.5725,0.4070) | 1916    | 66.68            |

**Table S9** The CIE and color purity of  $\text{Cl}_{1-x-y}\text{P: 0.05Eu}^{3+}, 0.04\text{Sm}^{3+}$  in different temperature.

| Temperature (K) | (x,y)           | CTT (K) | Color purity (%) |
|-----------------|-----------------|---------|------------------|
| 298             | (0.6305,0.3646) | 5117    | 86.60            |
| 323             | (0.6297,0.3653) | 4999    | 86.34            |
| 348             | (0.6290,0.3660) | 4890    | 86.11            |
| 373             | (0.6282,0.3668) | 4770    | 85.85            |
| 398             | (0.6270,0.3679) | 4605    | 85.45            |
| 423             | (0.6258,0.3689) | 4457    | 85.07            |
| 448             | (0.6243,0.3701) | 4285    | 84.58            |
| 473             | (0.6226,0.3714) | 4105    | 84.03            |
| 498             | (0.6202,0.3729) | 3892    | 83.26            |
| 523             | (0.6178,0.3749) | 3663    | 82.46            |
| 548             | (0.6154,0.3764) | 3482    | 81.69            |
| 573             | (0.6134,0.3781) | 3320    | 81.01            |
